# Supplementary material for: Characterization of the RnfB and RnfG Subunits of the Rnf Complex from the Archaeon Methanosarcina acetivorans
Source: PubMed Central journal article supplement (PMC4023990; doi:10.1371/journal.pone.0097966), 2014-05-16
Supplement: pone.0097966.s001.pdf [file pone.0097966.s001.pdf]

1 **Supporting Information**

2 **Figure S1. SDS-PAGE of purified wild-type RnfG and variant RnfG-T166A from**  
3 ***Methanosarcina acetivorans*.** Lane 1, molecular mass standards; lane 2, purified RnfG (15 µg);  
4 lane 3, purified RnfG-T166A (15 µg). Lanes 1-3 were stained with Coomassie brilliant blue  
5 R250. Lanes 4 and 5 correspond to lanes 2 and 3 exposed to UV illumination prior to protein  
6 staining.

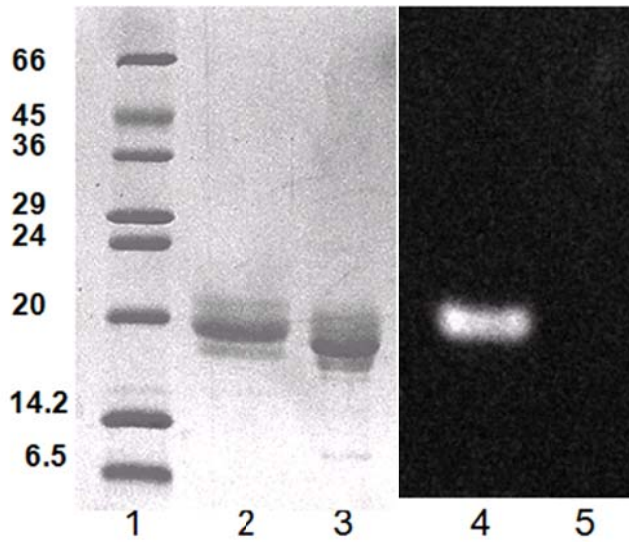

8 **Figure S2. Sequence alignment of RnfG from *Methanosarcina acetivorans* with NqrC from**  
9 ***Vibrio cholerae*.** Only the C-terminal domains are aligned showing potential FMN-binding  
10 motifs (**bold and underlined**) previously proposed for NqrC (). The threonine 166 residue of *M.*  
11 *acetivorans* RnfG is shown in ***bold italic***. Shaded residues are potential FMN-binding sites for  
12 RnfG. Aligned with NCBI blast. RnfG, MA0661, gene id 1472553; NqrC, VC2293, gene id  
13 4808844.

14  
15 NqrC GLWSMMYAFVAVETDGNTVSGLTYYEQG**ETPGLG**GEVENPAWRAQWVGKCLFDENHKPAI 203  
16 G M+ +D +T++G + ETPGLG + P ++ Q+V + D +  
17 RnfG GAQGMIQLLAGISSDFSTITGFQVMKHSET**TPGLG**LALITTPFQGFVDLPVADTS----- 151  
18  
19 NqrC KIVKGGAPQGSEHGVDGL**SGATLTS**NGV 231  
20 + K G VD +SGAT++S V  
21 RnfG -LTKNGGQ-----VDAIS**GAT**ISSQAV 172  
22

23 **Figure S3. SDS-PAGE of RnfB from *Methanosarcina acetivorans*.** Lane 1, molecular  
24 weight standards; Lane 2, purified RnfB stained with Coomassie blue R250; Lane 3, Western  
25 blot of purified RnfB using anti-His antibody coupled to alkaline phosphatase. The lanes were  
26 loaded with 15 µg of protein.

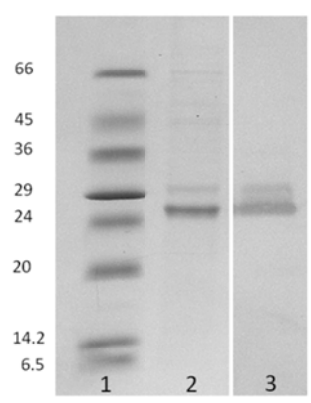

27



59 **Figure S5. Membrane topology of RnfA, RnfD and RnfE predicted with the**  
60 **HMMTOP algorithm.** The SGAT and SGTF motifs are highlighted. The topology was  
61 displayed using TOPO2.

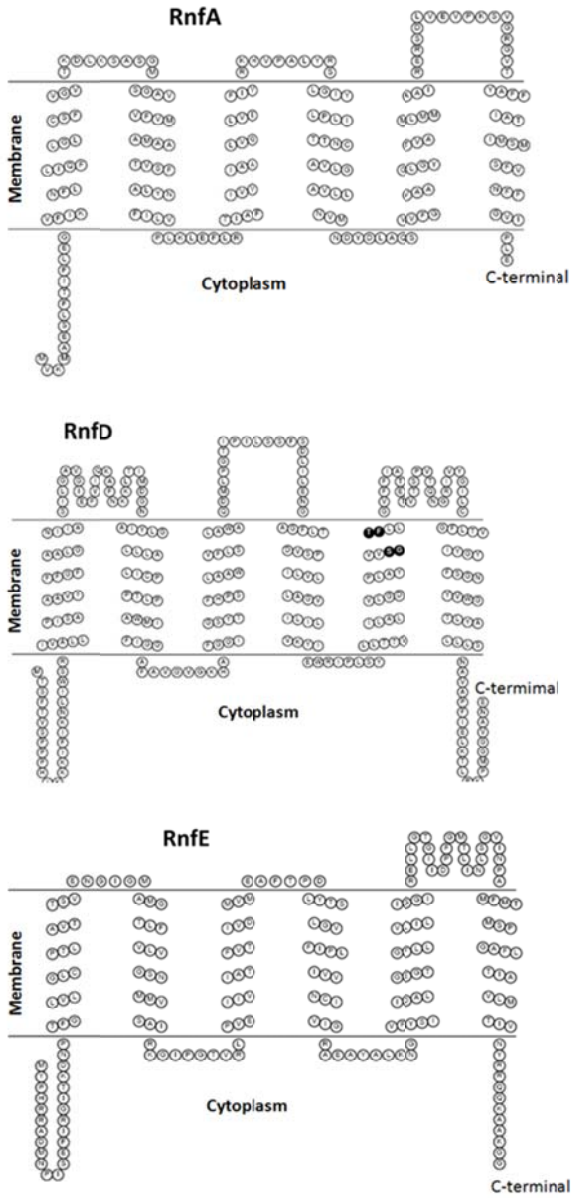

62
